# Supplementary material
Source: publisher figshare collection journal article supplement (https://tandf.figshare.com/articles/dataset/_/11537088)
Supplement: Supplementary file 1 [file 2]

Archive with 4 entries (4 files):
- ICOP 1708883 - SUPPLEMENT 1.pdf
- Online supplement 2 - Interview schedule.pdf
- Online supplement 3 - Coding manual.pdf
- Online supplement 4 -Table of themes.pdf
