# Supplementary material
Source: publisher figshare collection journal article supplement (https://tandf.figshare.com/articles/dataset/_/11537088)
Supplement: Supplementary file 1 [file 2 › Online supplement 2 - Interview schedule.pdf]

## Online supplement 2. Interview schedule

Thank you for agreeing to take part in this interview.

The interviewer introduces himself.

I would like to talk to you about how you spend your time when you are awake. The interview will last around 45 minutes.

- Please let me know at any point, if you would like to take a break, or stop the interview.
- If you prefer not to answer a question please let me know.
- The interview is being audio-recorded, but nothing you say will be linked to your name; you will have a unique identifying number.
- There are no correct or wrong answers, all opinions are helpful.
- Do you have any questions before we start?

| DOMAIN                                                                        | Questions                                                                                                                                                                                                                                                                                                                                                                                                                                                                                                                                                                                                                                                                                                                                                                                                              |
|-------------------------------------------------------------------------------|------------------------------------------------------------------------------------------------------------------------------------------------------------------------------------------------------------------------------------------------------------------------------------------------------------------------------------------------------------------------------------------------------------------------------------------------------------------------------------------------------------------------------------------------------------------------------------------------------------------------------------------------------------------------------------------------------------------------------------------------------------------------------------------------------------------------|
| <p>- <b>Knowledge</b></p> <p>(An awareness of the existence of something)</p> | <p>1) What does the term sedentary behaviour (SB) mean to you?</p> <p><i>Prompt</i> (if the participant does not know the meaning of SB): sedentary behaviour is .....</p> <p>2) Have you heard about SB before?</p> <p><i>Prompt</i> (if yes): From where?</p> <p>3) Can you give me some examples of a SB?</p> <p>4) Do you think that SB affects your health?</p> <p><i>Prompt</i> (if yes): In what way?</p> <p>5) How much time sitting do you spend throughout the day?</p> <p><i>Prompt</i>: When do you spend prolonged sitting time throughout the day (morning/afternoon/evening)? Why is that? Does your sitting time differ throughout the week (weekdays/weekends)? If so, in what way?</p> <p>6) Do you think there is any difference in risk based on when sitting time occurs? For example between</p> |

|                                                                                                                                                                                   |                                                                                                                                                                                                                                                                                                                                                                                                                                                                                                                                                             |
|-----------------------------------------------------------------------------------------------------------------------------------------------------------------------------------|-------------------------------------------------------------------------------------------------------------------------------------------------------------------------------------------------------------------------------------------------------------------------------------------------------------------------------------------------------------------------------------------------------------------------------------------------------------------------------------------------------------------------------------------------------------|
|                                                                                                                                                                                   | <p>someone who sits for an hour but breaks up time regularly by getting up every 15 minutes compared with someone who sits and stays sitting for an hour?</p> <p><i>Prompt:</i> In what way?</p>                                                                                                                                                                                                                                                                                                                                                            |
| <p>- <b>Skills</b></p> <p>(An ability or proficiency acquired through practice)</p>                                                                                               | <p>7) Are there skills that might help reduce your SB?</p> <p><i>Prompt:</i> can you clarify how these skills might work SB? How easy or difficult would it be to develop these skills?</p>                                                                                                                                                                                                                                                                                                                                                                 |
| <p>- <b>Social/Professional role and Identity</b></p> <p>(A coherent set of behaviours and displayed personal qualities of an individual in a social or work setting)</p>         | <p>8) To what extent does the severity of your lung disease impact on your sedentary behaviour?</p> <p>9) Who influences your sedentary time (makes it more or less)</p> <p><i>Prompt:</i> Your spouse or companion or any others?</p>                                                                                                                                                                                                                                                                                                                      |
| <p>- <b>Beliefs about capabilities</b></p> <p>(Acceptance of the truth, reality, or validity about an ability, talent, or facility that a person can put to constructive use)</p> | <p>10) Do you think you could change your SB?</p> <p><i>Prompt:</i> (why / why not?)</p> <p>11) How confident are you that you can decrease your SB?</p> <p><i>Prompts:</i></p> <ul style="list-style-type: none"> <li>- (if confidence low: what would make you feel more confident? Is there anything that would increase your confidence?)</li> <li>- (if not doing it: how confident are you that you could change to doing this more frequently?)</li> <li>- (if already doing it: how confident are you in maintaining or enhancing this?)</li> </ul> |
| <p>- <b>Optimism</b></p> <p>(The confidence that things will happen for the best or that desired goals will be attained)</p>                                                      | <p>12) Are you optimistic regarding changing your SB in the future?</p> <p><i>Prompt:</i> Why/Why not?</p> <p>13) In your opinion, how likely or unlikely is it that an intervention to reduce SB will be successful?</p> <p><i>Prompt:</i> Why?</p>                                                                                                                                                                                                                                                                                                        |
| <p>- <b>Beliefs about Consequences</b></p> <p>(Acceptance of the truth, reality, or</p>                                                                                           | <p>14) What do you think will happen if you change your SB?</p> <p>15) What do you think are the benefits of changing your SB</p>                                                                                                                                                                                                                                                                                                                                                                                                                           |

|                                                                                                                                                                                                  |                                                                                                                                                                                                                                                                                                                                                                                                                  |
|--------------------------------------------------------------------------------------------------------------------------------------------------------------------------------------------------|------------------------------------------------------------------------------------------------------------------------------------------------------------------------------------------------------------------------------------------------------------------------------------------------------------------------------------------------------------------------------------------------------------------|
| validity about outcomes of a behaviour in a given situation)                                                                                                                                     | for you?<br><i>Prompt:</i> For your family?                                                                                                                                                                                                                                                                                                                                                                      |
| <p>- <b>Reinforcement</b></p> <p>(Increasing the probability of a response by arranging a dependent relationship, or contingency, between the response and a given stimulus)</p>                 | <p>16) How do you think decreased SB can be encouraged?</p> <p><i>Prompt:</i> What would make it more likely that you would reduce your SB?</p> <p>17) How do you think an intervention that aims to decrease sedentary time should look? what should it include? what would be useful?</p>                                                                                                                      |
| <p>- <b>Intentions</b></p> <p>(A conscious decision to perform a behaviour or a resolve to act in a certain way)</p>                                                                             | <p>18) Do you intend to change your SB in the future?</p> <p><i>Prompt:</i> For example, do you intend to decrease your sitting time in the future? What about adding breaks to interrupt prolonged bouts of sedentary time?</p> <p>19) What types of intervention programs that target decreasing SB, you may participate in?</p> <p><i>Prompt:</i> If the participant does not intend to participate: why?</p> |
| <p>- <b>Goals</b></p> <p>(Mental representations of outcomes or end states that an individual wants to achieve)</p>                                                                              | <p>20) How important is it to you to decrease your SB?</p> <p>21) If you intend to change your SB, what is your target that you would like to achieve?</p> <p><i>Prompts:</i> decreasing sitting time/adding breaks to prolonged sitting time?. What factors make it more likely that you will achieve your goal? What are the barriers to achieving this goal?</p>                                              |
| <p>- <b>Memory, attention and decision processes</b></p> <p>(The ability to retain information, focus selectively on aspects of the environment and choose between two or more alternatives)</p> | <p>22) Again, what does SB mean to you?</p> <p>23) What are the health consequences of SB?</p>                                                                                                                                                                                                                                                                                                                   |
| <p>- <b>Environmental context and Resources</b></p> <p>(Any circumstance of a person's situation or environment that</p>                                                                         | <p>24) In your opinion, what are the facilitators to decreasing your SB?</p> <p><i>Prompt:</i> Can you give more details?</p> <p>25) What are the barriers to decreasing your SB?</p>                                                                                                                                                                                                                            |

|                                                                                                                                                                                                           |                                                                                                                                                                                                                                                                                                                   |
|-----------------------------------------------------------------------------------------------------------------------------------------------------------------------------------------------------------|-------------------------------------------------------------------------------------------------------------------------------------------------------------------------------------------------------------------------------------------------------------------------------------------------------------------|
| discourages or encourages the development of skills and abilities, independence, social competence, and adaptive behaviour)                                                                               | <i>Prompt:</i> Can you give more details?                                                                                                                                                                                                                                                                         |
| <b>- Social influences</b><br>(Those interpersonal processes that can cause individuals to change their thoughts, feelings, or behaviours)                                                                | 26) Do you think that your social circumstances such as living alone or with another person, influence your SB?<br><i>Prompt</i> (if yes): in what way?<br>27) Do you think that involving people such as loved ones in an intervention to decrease SB can be beneficial?<br><i>Prompt</i> (if yes): in what way? |
| <b>- Emotion</b><br>(A complex reaction pattern, involving experiential, behavioural, and physiological elements, by which the individual attempts to deal with a personally significant matter or event) | 28) Do you think that your SB contributes to your mood or fatigue?<br><i>Prompt</i> (if yes): How? Could you explain more?<br>29) How do your feelings affect whether or not you interrupt your sedentary state?                                                                                                  |
| <b>- Behavioural regulation</b><br>(Anything aimed at managing or changing objectively observed or measured actions)                                                                                      | 30) What would help you to reduce your SB?<br><i>Prompt:</i> Are there certain procedures you can follow to reduce your SB?<br>31) How can you break SB habit and replace it with physical activity?<br><i>Prompt:</i> can you give examples?                                                                     |
