# Supplementary material
Source: publisher figshare collection journal article supplement (https://tandf.figshare.com/articles/dataset/_/11537088)
Supplement: Supplementary file 1 [file 2 › Online supplement 3 - Coding manual.pdf]

### Online supplement 3. TDF coding manual

| DOMAIN                                                                        | Questions                                                                                                                                                                                                                                                                                                                                                                                                                                                                                                                                                                                                                                                                                                                                                                                                                                                                                                                                                                                                        | Themes                                                                                                                                                                                    |
|-------------------------------------------------------------------------------|------------------------------------------------------------------------------------------------------------------------------------------------------------------------------------------------------------------------------------------------------------------------------------------------------------------------------------------------------------------------------------------------------------------------------------------------------------------------------------------------------------------------------------------------------------------------------------------------------------------------------------------------------------------------------------------------------------------------------------------------------------------------------------------------------------------------------------------------------------------------------------------------------------------------------------------------------------------------------------------------------------------|-------------------------------------------------------------------------------------------------------------------------------------------------------------------------------------------|
| <p><b>- Knowledge</b></p> <p>(An awareness of the existence of something)</p> | <p>1) What does the term sedentary behaviour (SB) mean to you?</p> <p><i>Prompt</i> (if the participant does not know the meaning of SB): sedentary behaviour is .....</p> <p>2) Have you heard about SB before?</p> <p><i>Prompt</i> (if yes): From where?</p> <p>3) Can you give me some examples of a SB?</p> <p>4) Do you think that SB affects your health?</p> <p><i>Prompt</i> (if yes): In what way?</p> <p>5) How much time sitting do you spend throughout the day?</p> <p><i>Prompt</i>: When do you spend prolonged sitting time throughout the day (morning/afternoon/evening)? Why is that? Does your sitting time differ throughout the week (weekdays/weekends)? If so, in what way?</p> <p>6) Do you think there is any difference in risk based on when sitting time occurs? For example between someone who sits for an hour but breaks up time regularly by getting up every 15 minutes compared with someone who sits and stays sitting for an hour?</p> <p><i>Prompt</i>: In what way?</p> | <ul style="list-style-type: none"> <li>• (Lack of) Knowledge about what constitutes sedentary behaviour.</li> <li>• Patterns of accumulation</li> <li>• Amount of accumulation</li> </ul> |

|                                                                                                                                                                           |                                                                                                                                                                                                                                        |                                                                                                                                                                                                                                                                                                                                                                                                                     |
|---------------------------------------------------------------------------------------------------------------------------------------------------------------------------|----------------------------------------------------------------------------------------------------------------------------------------------------------------------------------------------------------------------------------------|---------------------------------------------------------------------------------------------------------------------------------------------------------------------------------------------------------------------------------------------------------------------------------------------------------------------------------------------------------------------------------------------------------------------|
|                                                                                                                                                                           |                                                                                                                                                                                                                                        |                                                                                                                                                                                                                                                                                                                                                                                                                     |
| <p>- <b>Skills</b></p> <p>(An ability or proficiency acquired through practice)</p>                                                                                       | <p>7) Are there skills that might help reduce your SB?</p> <p><i>Prompt:</i> can you clarify how these skills might work SB? How easy or difficult would it be to develop these skills?</p>                                            | <ul style="list-style-type: none"> <li>Physical skills (e.g. functional capacity)</li> </ul>                                                                                                                                                                                                                                                                                                                        |
| <p>- <b>Social/Professional role and Identity</b></p> <p>(A coherent set of behaviours and displayed personal qualities of an individual in a social or work setting)</p> | <p>8) To what extent does the severity of your lung disease impact on your sedentary behaviour?</p> <p>9) Who influences your sedentary time (makes it more or less)</p> <p><i>Prompt:</i> Your spouse or companion or any others?</p> | <ul style="list-style-type: none"> <li>Patients' role</li> <li>Disease impact (e.g., how their disease makes them feel or influences what they do).</li> <li>Comorbidities</li> <li>Pacing ( i.e. the patients pace themselves as a result of their disease)</li> <li>Identity as an 'exerciser' or 'active person'</li> <li>Individual responsibility (e.g. It is up to them to change their behaviour)</li> </ul> |

|                                                                                                                                                                                   |                                                                                                                                                                                                                                                                                                                                                                                                                                                                                                              |                                                                                                                                                                                                                          |
|-----------------------------------------------------------------------------------------------------------------------------------------------------------------------------------|--------------------------------------------------------------------------------------------------------------------------------------------------------------------------------------------------------------------------------------------------------------------------------------------------------------------------------------------------------------------------------------------------------------------------------------------------------------------------------------------------------------|--------------------------------------------------------------------------------------------------------------------------------------------------------------------------------------------------------------------------|
|                                                                                                                                                                                   |                                                                                                                                                                                                                                                                                                                                                                                                                                                                                                              |                                                                                                                                                                                                                          |
| <p>- <b>Beliefs about capabilities</b></p> <p>(Acceptance of the truth, reality, or validity about an ability, talent, or facility that a person can put to constructive use)</p> | <p>10) Do you think you could change your SB?</p> <p><i>Prompt: (why / why not?)</i></p> <p>11) How confident are you that you can decrease your SB?</p> <p><i>Prompts:</i></p> <p>- (if confidence low: what would make you feel more confident? Is there anything that would increase your confidence?)</p> <p>- (if not doing it: how confident are you that you could change to doing this more frequently?)</p> <p>- (if already doing it: how confident are you in maintaining or enhancing this?)</p> | <ul style="list-style-type: none"> <li>• Ease or difficulty of changing behaviour</li> <li>• (Lack of) confidence in becoming less sedentary</li> <li>• (Lack of) confidence in engaging in physically active</li> </ul> |
| <p>- <b>Optimism</b></p> <p>(The confidence that things will happen for the best or that desired goals will be attained)</p>                                                      | <p>12) Are you optimistic regarding changing your SB in the future?</p> <p><i>Prompt: Why/Why not?</i></p> <p>13) In your opinion, how likely or unlikely is it that an intervention to reduce SB will be successful?</p> <p><i>Prompt: Why?</i></p>                                                                                                                                                                                                                                                         | <ul style="list-style-type: none"> <li>• Belief that there will be (or not) a reduction in sedentary behaviour</li> <li>• General optimism</li> </ul>                                                                    |
| <p>- <b>Beliefs about Consequences</b></p> <p>(Acceptance of the truth, reality, or validity about outcomes of a behaviour in a given situation)</p>                              | <p>14) What do you think will happen if you change your SB?</p> <p>15) What do you think are the benefits of changing your SB for you?</p> <p><i>Prompt: For your family?</i></p>                                                                                                                                                                                                                                                                                                                            | <ul style="list-style-type: none"> <li>• Positives: Physical, psychological, social benefits of being less sedentary (e.g. better quality of life, less anxiety)</li> <li>• Negatives:</li> </ul>                        |

|                                                                                                                                                                               |                                                                                                                                                                                                                                                                                                                                 |                                                                                                                                                                                                                                             |
|-------------------------------------------------------------------------------------------------------------------------------------------------------------------------------|---------------------------------------------------------------------------------------------------------------------------------------------------------------------------------------------------------------------------------------------------------------------------------------------------------------------------------|---------------------------------------------------------------------------------------------------------------------------------------------------------------------------------------------------------------------------------------------|
|                                                                                                                                                                               |                                                                                                                                                                                                                                                                                                                                 | <p>negative physical, psychological, social consequences of being less sedentary (e.g. more shortness of breath, lack of energy at the end of the day)</p>                                                                                  |
| <p>- <b>Reinforcement</b><br/>(Increasing the probability of a response by arranging a dependent relationship, or contingency, between the response and a given stimulus)</p> | <p>16) How do you think decreased SB can be encouraged?<br/>Prompt: What would make it more likely that you would reduce your SB?</p> <p>17) How do you think an intervention that aims to decrease sedentary time should look? what should it include? what would be useful?</p>                                               | <ul style="list-style-type: none"> <li>• Explicit encouragement (e.g., direct verbal encouragement in person, in advertisements or other communication materials).</li> <li>• Follow-up</li> <li>• Rewards</li> <li>• Punishment</li> </ul> |
| <p>- <b>Intentions</b><br/>(A conscious decision to perform a behaviour or a resolve to act in a certain way)</p>                                                             | <p>18) Do you intend to change your SB in the future?<br/><i>Prompt:</i> For example, do you intend to decrease your sitting time in the future? What about adding breaks to interrupt prolonged bouts of sedentary time?</p> <p>19) What types of intervention programs that target decreasing SB, you may participate in?</p> | <ul style="list-style-type: none"> <li>• (Lack of) Intention to reduce prolonged SB</li> <li>• Trying/effort</li> </ul>                                                                                                                     |

|                                                                                                                                                                                                  |                                                                                                                                                                                                                                                                                                                                                                     |                                                                                                                                                                                                       |
|--------------------------------------------------------------------------------------------------------------------------------------------------------------------------------------------------|---------------------------------------------------------------------------------------------------------------------------------------------------------------------------------------------------------------------------------------------------------------------------------------------------------------------------------------------------------------------|-------------------------------------------------------------------------------------------------------------------------------------------------------------------------------------------------------|
|                                                                                                                                                                                                  | <i>Prompt: If the participant does not intend to participate: why?</i>                                                                                                                                                                                                                                                                                              |                                                                                                                                                                                                       |
| <p>- <b>Goals</b></p> <p>(Mental representations of outcomes or end states that an individual wants to achieve)</p>                                                                              | <p>20) How important is it to you to decrease your SB?</p> <p>21) If you intend to change your SB, what is your target that you would like to achieve?</p> <p><i>Prompts: decreasing sitting time/adding breaks to prolonged sitting time?. What factors make it more likely that you will achieve your goal? What are the barriers to achieving this goal?</i></p> | <ul style="list-style-type: none"> <li>• Importance of reducing sedentary behaviour (i.e. health management priorities)</li> <li>• Plans to reduce sedentary behaviour (e.g. goal-setting)</li> </ul> |
| <p>- <b>Memory, attention and decision processes</b></p> <p>(The ability to retain information, focus selectively on aspects of the environment and choose between two or more alternatives)</p> | <p>22) Again, what does SB mean to you?</p> <p>23) What are the health consequences of SB?</p>                                                                                                                                                                                                                                                                      | <ul style="list-style-type: none"> <li>• (Lack of) Memory or recollection of previous information provided by interviewer</li> </ul>                                                                  |
| <p>- <b>Environmental context and Resources</b></p> <p>(Any circumstance of a person's situation or environment that discourages or encourages the development of skills and abilities,</p>      | <p>24) In your opinion, what are the facilitators to decreasing your SB?</p> <p><i>Prompt: Can you give more details?</i></p> <p>25) What are the barriers to decreasing your SB?</p> <p><i>Prompt: Can you give more details?</i></p>                                                                                                                              | <ul style="list-style-type: none"> <li>• Space and home design</li> <li>• Neighbourhood design</li> <li>• Equipment</li> <li>• Weather/time of the year</li> </ul>                                    |

|                                                                                                                                                    |                                                                                                                                                                                                                                                                                                                                |                                                                                                                                                                                                                                                                                                                                                                                                                         |
|----------------------------------------------------------------------------------------------------------------------------------------------------|--------------------------------------------------------------------------------------------------------------------------------------------------------------------------------------------------------------------------------------------------------------------------------------------------------------------------------|-------------------------------------------------------------------------------------------------------------------------------------------------------------------------------------------------------------------------------------------------------------------------------------------------------------------------------------------------------------------------------------------------------------------------|
| independence, social competence, and adaptive behaviour)                                                                                           |                                                                                                                                                                                                                                                                                                                                | <ul style="list-style-type: none"> <li>• Access to activities programs</li> <li>• Person by environment interaction (e.g., confidence exhibited only when the weather isn't bad)</li> </ul>                                                                                                                                                                                                                             |
| <p>- <b>Social influences</b><br/>(Those interpersonal processes that can cause individuals to change their thoughts, feelings, or behaviours)</p> | <p>26) Do you think that your social circumstances such as living alone or with another person, influence your SB?<br/><i>Prompt</i> (if yes): in what way?</p> <p>27) Do you think that involving people such as loved ones in an intervention to decrease SB can be beneficial?<br/><i>Prompt</i> (if yes): in what way?</p> | <ul style="list-style-type: none"> <li>• (Lack of) Support from family/loved ones</li> <li>• Support from peers</li> <li>• Hired help/care takers</li> <li>• Accountability (e.g., having someone around facilitates more active behaviour, without direct verbal contact).</li> <li>• Modelling (e.g., comparison of self to others, or comparison of former self to current self).</li> <li>• Social norms</li> </ul> |
| <p>- <b>Emotion</b><br/>(A complex reaction pattern, involving</p>                                                                                 | <p>28) Do you think that your SB contributes to your mood or fatigue?<br/><i>Prompt</i> (if yes): How? Could you</p>                                                                                                                                                                                                           | <ul style="list-style-type: none"> <li>• Stress</li> <li>• Anxiety</li> <li>• Depression</li> </ul>                                                                                                                                                                                                                                                                                                                     |

|                                                                                                                                                       |                                                                                                                                                                                                                                                                  |                                                                                                                                                                                                                                                                                                                        |
|-------------------------------------------------------------------------------------------------------------------------------------------------------|------------------------------------------------------------------------------------------------------------------------------------------------------------------------------------------------------------------------------------------------------------------|------------------------------------------------------------------------------------------------------------------------------------------------------------------------------------------------------------------------------------------------------------------------------------------------------------------------|
| <p>experiential, behavioural, and physiological elements, by which the individual attempts to deal with a personally significant matter or event)</p> | <p>explain more?</p> <p>29) How do your feelings affect whether or not you interrupt your sedentary state?</p>                                                                                                                                                   | <ul style="list-style-type: none"> <li>• Frustration</li> <li>• Low mood</li> <li>• Fun/enjoyment of physical activity</li> <li>• Enjoyment of SB (e.g. enjoying being sedentary and relaxed, enjoy sitting on tv)</li> </ul>                                                                                          |
| <p>- <b>Behavioural regulation</b></p> <p>(Anything aimed at managing or changing objectively observed or measured actions)</p>                       | <p>30) What would help you to reduce your SB?</p> <p><i>Prompt: Are there certain procedures you can follow to reduce your SB?</i></p> <p>31) How can you break SB habit and replace it with physical activity?</p> <p><i>Prompt: can you give examples?</i></p> | <ul style="list-style-type: none"> <li>• Self-monitoring (tracking how often the patient sits)</li> <li>• Self-talk</li> <li>• Pacing (i.e. the patients are pacing themselves to promote their PA or to reduce SB)</li> <li>• Action planning</li> <li>• Generating alternatives</li> <li>• Breaking habit</li> </ul> |
