# Supplementary material
Source: publisher figshare collection journal article supplement (https://tandf.figshare.com/articles/dataset/_/11537088)
Supplement: Supplementary file 1 [file 2 › Online supplement 4 -Table of themes.pdf]

**Online supplement 4.** Domains summary themes (B= barrier, F=facilitator, P= participant).

| TDF domains | Frequency<br>(number of<br>quotes coded<br>into the domain) | Themes/belief statements                                                                                                                                                                                                                                                                      | Sample quotes                                                                                                                                                                                                                                                                                                                                                                                                                                                                                                                                                                                                                                                                                                                                                                                                                                                            |
|-------------|-------------------------------------------------------------|-----------------------------------------------------------------------------------------------------------------------------------------------------------------------------------------------------------------------------------------------------------------------------------------------|--------------------------------------------------------------------------------------------------------------------------------------------------------------------------------------------------------------------------------------------------------------------------------------------------------------------------------------------------------------------------------------------------------------------------------------------------------------------------------------------------------------------------------------------------------------------------------------------------------------------------------------------------------------------------------------------------------------------------------------------------------------------------------------------------------------------------------------------------------------------------|
| Knowledge   | 132                                                         | <p>Sedentary behaviour is perceived as laziness or idle time (B).</p> <p>Low estimates of how much time spent sitting (B).</p> <p>Desire to be educated (told and shown) by knowledgeable health professionals in a formal program.</p> <p>Prolonged periods of SB occurs in the evening.</p> | <p>“Sedentary? I have no idea. Sedentary, I don't even know what the word means”. P4<br/>         “[I spend] Half an hour [sitting per day]. Sedentary sitting time? Driving is not sedentary. You're sitting, but you're alert.” P10</p> <p>“Breakfast is about a half an hour, phone calls maybe an hour, lunch again, about half an hour to eat. Supper is a bit longer. So what, 3 hours a day.” P12</p> <p>“Definitely, there are procedures, you just got to do it. But you've got to know what they are, too. You need instructions, you need somebody to point you in the right direction and to show you” P9.<br/>         “Well, the better knowledge you have how to survive, the better. So I think me, myself, if the changes that I believe will help me – even if I don't believe that - the doctors tell me, 'Sir, you should do this,' I do it.” P6</p> |

|                                       |     |                                                                                                                                                                                                                                               |                                                                                                                                                                                                                                                                                                                                                                                                                                                                                                                                                                                                       |
|---------------------------------------|-----|-----------------------------------------------------------------------------------------------------------------------------------------------------------------------------------------------------------------------------------------------|-------------------------------------------------------------------------------------------------------------------------------------------------------------------------------------------------------------------------------------------------------------------------------------------------------------------------------------------------------------------------------------------------------------------------------------------------------------------------------------------------------------------------------------------------------------------------------------------------------|
|                                       |     |                                                                                                                                                                                                                                               | <p>"Evening [when prolonged sitting occurs]. That's when the programs are good, or better. And mainly the soccer games, and I watch soccer games" P6</p> <p>"In the evening [I sit more]. After supper. That's when I normally like to, it's just habit. Even when I was working, that's when one would sit down and relax. So it becomes a habit. During the day I have some diversions I guess, I'll cook. I like to make home-baked stuff, you know. And I do a bit of cooking, if I can, if I'm up to it. And baking. I try to not be seated all day long. Cause I don't believe in that." P7</p> |
| Skills                                | 12  | <p>Reduced fitness leads to increased SB (B).</p> <p>Learning how to manage patients' SOB is important to increase their PA (F).</p> <p>Desire to be educated (told and shown) by knowledgeable health professionals in a formal program.</p> | <p>"I just don't have the physical wherewithal to get up and do things. I wear out very, very quickly" P2</p> <p>"But I think a lot of us at the day hospital have learned how to control shortness of breath [so we can move more]." P2</p> <p>"Education. To know what I can do, or different things to do, to be educated on, to be trained on different things that will help, even if it's just the movement and how to move and what to do. Education is a big part of this" P9</p>                                                                                                             |
| Social/Professional role and Identity | 101 | <p>Participants experiences of their disease place constraints on how they perceive themselves and the activities they consider appropriate for them (B)</p>                                                                                  | <p>"It [disease severity] absolutely impacts my sedentary behaviour. I was always a very active person. And I found that every year, like I said, I started off here and I would go down, down, down." P2</p>                                                                                                                                                                                                                                                                                                                                                                                         |

|  |  |                                                                                                                                                      |                                                                                                                                                                                                                                                                                                                                                                                                                                                                                                                                                                                                                                                                                                                                                                                                                                                                                                                                                                                                                                                                                                                                                                                                                                                                                                                                                                                                                                                                                                                |
|--|--|------------------------------------------------------------------------------------------------------------------------------------------------------|----------------------------------------------------------------------------------------------------------------------------------------------------------------------------------------------------------------------------------------------------------------------------------------------------------------------------------------------------------------------------------------------------------------------------------------------------------------------------------------------------------------------------------------------------------------------------------------------------------------------------------------------------------------------------------------------------------------------------------------------------------------------------------------------------------------------------------------------------------------------------------------------------------------------------------------------------------------------------------------------------------------------------------------------------------------------------------------------------------------------------------------------------------------------------------------------------------------------------------------------------------------------------------------------------------------------------------------------------------------------------------------------------------------------------------------------------------------------------------------------------------------|
|  |  | <p>It's individuals responsibility to change their SB (F,B).</p> <p>Comorbidities were frequently reported and seem to increase patients SB (B).</p> | <p>"I find I lose my breath a lot, very fast. I can walk from the front room to the bathroom and be out of breath and then go into panic attacks. I take them a lot. But I, they taught me how to come out of them so I know how to get myself back. But it takes a while." P2</p> <p>"Well, it [disease] makes you want to be lazy. It makes you want to sit there. It.....mentally, it puts you in a frame of mind where you think, 'what the hell is the sense, even if I do climb those stairs, by the time I get to the top of them I'm going to be bent over, gasping for air. So do I do it or do I don't do it. Will I live longer if I do it, will I not live longer....!?' I don't know." P9</p> <p>"But seriously. Honestly, I don't know what there is out there that could....there's nothing you could do, to encourage me to walk. I know myself that I should be walking. I know I should. There's nothing, it has to come from me. Has to come from me." P4</p> <p>"I'm on my own, I'm a widow. As I say, my son and daughter-in-law are upstairs. But if I need anything or to do anything, they're there. But as I say, it's up to me to do what I have to do" P7</p> <p>"I have fibromyalgia. Apart from that I have very bad pain in my legs. When I'm sitting, you'd never know I had pain in my legs. The minute I rise to do something, I realize of course my pain, I've got pains. So with exercise comes pain, if you have pain. It comes with exacerbated pain, more pain." P4</p> |
|--|--|------------------------------------------------------------------------------------------------------------------------------------------------------|----------------------------------------------------------------------------------------------------------------------------------------------------------------------------------------------------------------------------------------------------------------------------------------------------------------------------------------------------------------------------------------------------------------------------------------------------------------------------------------------------------------------------------------------------------------------------------------------------------------------------------------------------------------------------------------------------------------------------------------------------------------------------------------------------------------------------------------------------------------------------------------------------------------------------------------------------------------------------------------------------------------------------------------------------------------------------------------------------------------------------------------------------------------------------------------------------------------------------------------------------------------------------------------------------------------------------------------------------------------------------------------------------------------------------------------------------------------------------------------------------------------|



|  |  |                                                                                                                                                                                                                                                                                                              |                                                                                                                                                                                                                                                                                                                                                                                                                                                                                                                                                                                                                                                                                                                                                                                                                                                                                                                                                                                                                                                                                                                                                                                                                                                                                                                                   |
|--|--|--------------------------------------------------------------------------------------------------------------------------------------------------------------------------------------------------------------------------------------------------------------------------------------------------------------|-----------------------------------------------------------------------------------------------------------------------------------------------------------------------------------------------------------------------------------------------------------------------------------------------------------------------------------------------------------------------------------------------------------------------------------------------------------------------------------------------------------------------------------------------------------------------------------------------------------------------------------------------------------------------------------------------------------------------------------------------------------------------------------------------------------------------------------------------------------------------------------------------------------------------------------------------------------------------------------------------------------------------------------------------------------------------------------------------------------------------------------------------------------------------------------------------------------------------------------------------------------------------------------------------------------------------------------|
|  |  | <p>Confidence is important to decrease SB and increase physical activity (F, B)</p> <p>There was a lack of confidence for physical tasks that were more easily accomplished earlier in life (B)</p> <p>Desire to be educated (told and shown) by knowledgeable health professionals in a formal program.</p> | <p>being able to confidently do it. I've pushed the button, I've pushed the limits sometimes, and then I pay for it." P12</p> <p>"Yeah, I do know there's still barriers for me. If there's a barrier [to reducing SB] I'll get out of it. I don't believe in barriers." COPD3</p> <p>"Well for me I know I can do more. I know my limitations." P9</p> <p>"I mean, I used to [sit less]....what troubles me is, it annoys me, is when I was without this issue [COPD], I used to be able to do so much more, of course. By nature I move very fast, and that has slowed down. And if I do move fast, I pay for it, I really do pay for it. So I've got to remind myself to pace myself. I have to think about what I'm doing. Whereas before I would do things without thinking. It was just a part of my normal everyday life. I don't have that privilege anymore." P7</p> <p>"Okay, you go out in the garden for an hour but your breathing doesn't let you. I used to sit out there for hours, reading and doing stuff but I can't do that anymore." P14</p> <p>"I think that people have to be given the confidence to show that they can do more." P12</p> <p>"I think if it [education] gives people confidence that they can do it. It's not that they should, but that they can. Because I think, to me anyway, the</p> |
|--|--|--------------------------------------------------------------------------------------------------------------------------------------------------------------------------------------------------------------------------------------------------------------------------------------------------------------|-----------------------------------------------------------------------------------------------------------------------------------------------------------------------------------------------------------------------------------------------------------------------------------------------------------------------------------------------------------------------------------------------------------------------------------------------------------------------------------------------------------------------------------------------------------------------------------------------------------------------------------------------------------------------------------------------------------------------------------------------------------------------------------------------------------------------------------------------------------------------------------------------------------------------------------------------------------------------------------------------------------------------------------------------------------------------------------------------------------------------------------------------------------------------------------------------------------------------------------------------------------------------------------------------------------------------------------|

|                            |    |                                                                                                                                                                                         |                                                                                                                                                                                                                                                                                                                                                                                                                                                                                                                                                                                                                                                                                                                                                                                                                                                                                                       |
|----------------------------|----|-----------------------------------------------------------------------------------------------------------------------------------------------------------------------------------------|-------------------------------------------------------------------------------------------------------------------------------------------------------------------------------------------------------------------------------------------------------------------------------------------------------------------------------------------------------------------------------------------------------------------------------------------------------------------------------------------------------------------------------------------------------------------------------------------------------------------------------------------------------------------------------------------------------------------------------------------------------------------------------------------------------------------------------------------------------------------------------------------------------|
|                            |    |                                                                                                                                                                                         | more you know about your body, the more you can do." P12                                                                                                                                                                                                                                                                                                                                                                                                                                                                                                                                                                                                                                                                                                                                                                                                                                              |
| Optimism                   | 15 | <p>Generally optimistic outlook (F)</p> <p>Optimism depends on motivation and personal beliefs (B,F)</p>                                                                                | <p>"I think there's always hope, I mean I'm an optimist." P12</p> <p>"Yeah. I'm optimistic about everything, including life!" P11</p> <p>"No [not optimistic regarding reducing SB] Let's put it this way: I know I have a disease, whatever you want to call it, that's not going to get any better" P7</p> <p>"So it seems – and I think attitude really helps. A positive attitude if necessary." P11</p>                                                                                                                                                                                                                                                                                                                                                                                                                                                                                          |
| Beliefs about Consequences | 96 | <p>Recognition of the positive benefits of reducing SB and the negative consequences of sitting for long periods (F)</p> <p>Reducing SB increases breathlessness and vice versa (B)</p> | <p>"But just getting up and moving a little bit and then resting for a while, then doing something else seems to be more beneficial." P2</p> <p>"I've been having a lot of trouble with my legs lately. If I sit for long periods of time, my knees get sore. So I get up and just wander around the apartment." P2</p> <p>"I think I'll get healthier [IF I REDUCE MY SB], my breathing will definitely, definitely, definitely, most definitely improve. I may even lose more weight." P4</p> <p>"I'll try to make it a couple of hours just to regain my strength, to build up the level again. But the more I do, the less energy I end up having, to spend at the end of the day" COPD2</p> <p>"Well it's a catch-22. When you do move, your breathing is worse. So because your breathing is worse, you sit more. And then you sit, so it's a catch-22. You know it's a total catch-22." P4</p> |

|               |    |                                                                                                                                                                                             |                                                                                                                                                                                                                                                                                                                                                                                                                                                                                                                                                                                                                                                                                                                                                                                                                              |
|---------------|----|---------------------------------------------------------------------------------------------------------------------------------------------------------------------------------------------|------------------------------------------------------------------------------------------------------------------------------------------------------------------------------------------------------------------------------------------------------------------------------------------------------------------------------------------------------------------------------------------------------------------------------------------------------------------------------------------------------------------------------------------------------------------------------------------------------------------------------------------------------------------------------------------------------------------------------------------------------------------------------------------------------------------------------|
|               |    | <p>Desire to be educated (told and shown) by knowledgeable health professionals in a formal program.</p>                                                                                    | <p>“We have to keep telling them that the more they move, the better off they are. It's almost .. don't know.” P8</p> <p>“you can tell somebody till you're blue in the face, it doesn't mean they're going to listen. But if you can show them and prove to them that by walking on that treadmill or by using that elliptical or that new step, or standing there and moving your hands and feet is going to help your lungs and help you breathe better, and you're going to be able to walk from here to the door. When people realize that that are sick, they're going to do it.” P9</p>                                                                                                                                                                                                                               |
| Reinforcement | 23 | <p>Desire to be educated (told and shown) by knowledgeable health professionals in a formal program.</p> <p>Explicit encouragement and follow up from HCP are keys to reducing SB (F,B)</p> | <p>“I suggest encouragement from the healthcare providers. I'm not so sure about follow-up cause some people – particularly in my age group which is what you're going to be dealing with – they resent the attitude of being lectured to, okay. That's what it may feel like to them, 'Oh, you're just being the teacher....' You know, that kind of thing.” P5</p> <p>“Again, it's one of those things that encouraging people to understand better what should be done to benefit ourselves through our lives, with our problems, with our sickness, it certainly will help. You know, conversation like encouraging people what we should do to what benefit us.” P6</p> <p>“But they [healthcare professionals] don't emphasize it [reducing sitting time]. It's not emphasized that this is not the end, you know.</p> |

|            |    |                                                                                                                                                                                                                                                                                            |                                                                                                                                                                                                                                                                                                                                                                                                                                                                                                                                                                                                                                                                                                                                                                                                                                                                        |
|------------|----|--------------------------------------------------------------------------------------------------------------------------------------------------------------------------------------------------------------------------------------------------------------------------------------------|------------------------------------------------------------------------------------------------------------------------------------------------------------------------------------------------------------------------------------------------------------------------------------------------------------------------------------------------------------------------------------------------------------------------------------------------------------------------------------------------------------------------------------------------------------------------------------------------------------------------------------------------------------------------------------------------------------------------------------------------------------------------------------------------------------------------------------------------------------------------|
|            |    |                                                                                                                                                                                                                                                                                            | <p>They tell you, and they might tell you 2 or 3 times, but that's it. I don't think I heard that warning 3, maybe 4 times in the 6 weeks I was here. They should tell you that every morning, 'Buddy, when you go home, you do this! COPD10 Yeah. I think there should be a follow-up, because if there's not a follow-up, after a week you're not going to do it anymore." P9</p>                                                                                                                                                                                                                                                                                                                                                                                                                                                                                    |
| Intentions | 50 | <p>Participants are willing to try and reduce SB (F)</p> <p>Desire to be educated (told and shown) by knowledgeable health professionals in a formal program.</p> <p>Participation in an intervention to reduce SB depends on its' components</p> <p>Ambivalence about reducing SB (B)</p> | <p>"So I do try to be as active as I can." P2</p> <p>"I will [reduce my SB] if I know what more to do." P8</p> <p>"I'm willing to try [an intervention to reduce SB]. I think it could be very effective, it depends on what it is" P5</p> <p>"I don't know, how can you motivate people, you know. It's motivation, right. And I will tell you, if I walk you know, one hour in the morning, an hour in the afternoon, I will last for sure another 5 or 6 years. Or seven years. For sure. For sure. But do I want to?" P13</p> <p>"[I will reduce my sitting time] If there was a motive to. Otherwise I'm not unhappy with what I do, at all." P11</p> <p>"Yes [I know I should reduce my sitting time], but I don't. I know I could. Let me rephrase that, I know I should but I don't. If I come here and I've done my exercises and I go home, I go, that's</p> |

|                       |    |                                                                                                                                                                                                                            |                                                                                                                                                                                                                                                                                                                                                                                                                                                                                                                                                                                                                                                                                                                                                                                      |
|-----------------------|----|----------------------------------------------------------------------------------------------------------------------------------------------------------------------------------------------------------------------------|--------------------------------------------------------------------------------------------------------------------------------------------------------------------------------------------------------------------------------------------------------------------------------------------------------------------------------------------------------------------------------------------------------------------------------------------------------------------------------------------------------------------------------------------------------------------------------------------------------------------------------------------------------------------------------------------------------------------------------------------------------------------------------------|
|                       |    |                                                                                                                                                                                                                            | <p>great I feel good. Great, I'll sit and relax. Hello!." P4</p> <p>"You know, people with COPD, we know we should do more, more movement in our body. Of course we do. Sometimes we're gung-ho and we do. Then it peters down and gradually you're not doing as much exercise as you should. But you're sitting. Everyone sits more than they should." P4</p>                                                                                                                                                                                                                                                                                                                                                                                                                       |
| Goals                 | 35 | <p>Reducing SB is important to participants</p> <p>Preference to break up prolonged periods of sitting instead of reducing the total sitting time</p> <p>Having a purposeful reason to move is important reduce SB (F)</p> | <p>"As I continue to age it's very important [to reduce SB]." COPD5</p> <p>"It's very important, not just for me but for everyone. Especially seniors." COPD14</p> <p>"It's actually very important. I don't like feeling sick. I know that because I'm sedentary it's not helping me." P2</p> <p>"I guess a break down of sitting time [is my goal to reduce SB]" P14</p> <p>"Probably adding breaks [to reduce SB]" P8</p> <p>"That's the key, there you go, that's the word I'm looking for – purpose. You need to have a purpose every day to move. You need a reason." P10</p> <p>"I find I can only sit in front of the computer for so long, then I'll get up and have a bit to eat or make a coffee. So it's having a purpose, it makes it much easier to do things." P2</p> |
| Memory, Attention and | 28 | Participants were able to remember previous information provided by interviewer (F)                                                                                                                                        |                                                                                                                                                                                                                                                                                                                                                                                                                                                                                                                                                                                                                                                                                                                                                                                      |

|                                      |    |                                                                                                                                                 |                                                                                                                                                                                                                                                                                                                                                                                                                                                                                                                                                                                                                                                                                                                                                                                                                                                                                                                                                                                                                                                                                                                                                                                                                                                                                                                                                                                                    |
|--------------------------------------|----|-------------------------------------------------------------------------------------------------------------------------------------------------|----------------------------------------------------------------------------------------------------------------------------------------------------------------------------------------------------------------------------------------------------------------------------------------------------------------------------------------------------------------------------------------------------------------------------------------------------------------------------------------------------------------------------------------------------------------------------------------------------------------------------------------------------------------------------------------------------------------------------------------------------------------------------------------------------------------------------------------------------------------------------------------------------------------------------------------------------------------------------------------------------------------------------------------------------------------------------------------------------------------------------------------------------------------------------------------------------------------------------------------------------------------------------------------------------------------------------------------------------------------------------------------------------|
| Decision Processes'                  |    |                                                                                                                                                 |                                                                                                                                                                                                                                                                                                                                                                                                                                                                                                                                                                                                                                                                                                                                                                                                                                                                                                                                                                                                                                                                                                                                                                                                                                                                                                                                                                                                    |
| Environmental Context and Resources' | 89 | <p>To reduce SB, participants want to get out of their home.</p> <p>Preference for structured programs to reduce SB or be physically active</p> | <p>"I think....in order to move you have to be out. Not in your home. I can't....it's not exactly motivation, but I think it's ....we're too comfortable in our own house. But when you're with other people, you're talking and moving automatically. I don't know, is that it?" P14</p> <p>"And maybe having something written down or a poster, somebody might get the idea: 'Oh, I can go to the community centre and play cards.' So you're still somewhat sedentary but you've had to get up from your home to get there and, you know, play cards for a couple of hours and then you're back moving to get home again." P2</p> <p>" I think coming here has motivated me a lot. And I think what frightens me the most is when I finish with the program, I'm going to be on my own. And I think I'm going to decline, to be honest with you. Because here you've got motivation, you've got the physios, you've got people around you, you've got the equipment." P14</p> <p>"if I can do the rehab for free, I'm going to do it. Or maybe introductory classes to [unclear]: 'If you're interested in blah blah' would be good. But I can't think of what the 'blah blah' is!" P11</p> <p>"So I'll have to find somewhere else. Well I've found somewhere else. I need the structure. I need that. That's why I think, I think a support group is very good. A support group is good.</p> |

|  |  |                                                                                                       |                                                                                                                                                                                                                                                                                                                                                                                                                                                                                                                                                                                                                                                                                                                                                                                                                                                                                                                                                                                                                                                                                                                                                                                                                                                                                                                                                                                                   |
|--|--|-------------------------------------------------------------------------------------------------------|---------------------------------------------------------------------------------------------------------------------------------------------------------------------------------------------------------------------------------------------------------------------------------------------------------------------------------------------------------------------------------------------------------------------------------------------------------------------------------------------------------------------------------------------------------------------------------------------------------------------------------------------------------------------------------------------------------------------------------------------------------------------------------------------------------------------------------------------------------------------------------------------------------------------------------------------------------------------------------------------------------------------------------------------------------------------------------------------------------------------------------------------------------------------------------------------------------------------------------------------------------------------------------------------------------------------------------------------------------------------------------------------------|
|  |  | <p>Home spaciousness helps reducing SB (F)</p> <p>Weather influences SB and activity levels (F,B)</p> | <p>That really is a plus, I think. And the odd class, like tai-chi, or things like that, I think these are good, they are beneficial for us." COPD4</p> <p>"The barriers....yeah, if I move into a smaller place, there's not going to be that much space to pace around. That's going to be a big one, which is one of the reasons why I'm stalling around about moving. I don't want to move." P5</p> <p>"If it's humid, I have a, that's a barrier – do you want to write that down – that's a barrier, humidity. I have a sensitivity to humidity. So Toronto's a bad place to be for the humidity! Yeah, yeah. Just the humidity." P8</p> <p>"Oh definitely the weather. Whether it's, you know, when it's really, really hot outside, you can't go, when it's really, really cold, you can't breathe. So then again, that's where being able to go to a gym or being able to go to a facility comes into play because we just can't do it. You can't go out when it's really cold cause you can't breathe. When it's really hot and humid, you can't breathe. So weather has a lot to do with our condition and how we deal with everything." P9 (B)</p> <p>"In the nicer weather, I go to the park. I walk around a little bit, until I get tired. Then I sit down for a few minutes. Recupe, then go walk again. I go to the mall, a little strip mall, I go there every day." P1 (F)</p> |
|--|--|-------------------------------------------------------------------------------------------------------|---------------------------------------------------------------------------------------------------------------------------------------------------------------------------------------------------------------------------------------------------------------------------------------------------------------------------------------------------------------------------------------------------------------------------------------------------------------------------------------------------------------------------------------------------------------------------------------------------------------------------------------------------------------------------------------------------------------------------------------------------------------------------------------------------------------------------------------------------------------------------------------------------------------------------------------------------------------------------------------------------------------------------------------------------------------------------------------------------------------------------------------------------------------------------------------------------------------------------------------------------------------------------------------------------------------------------------------------------------------------------------------------------|

|  |  |                                                                                               |                                                                                                                                                                                                                                                                                                                                                                                                                                                                                                                                                                                                                                                                                                                                            |
|--|--|-----------------------------------------------------------------------------------------------|--------------------------------------------------------------------------------------------------------------------------------------------------------------------------------------------------------------------------------------------------------------------------------------------------------------------------------------------------------------------------------------------------------------------------------------------------------------------------------------------------------------------------------------------------------------------------------------------------------------------------------------------------------------------------------------------------------------------------------------------|
|  |  | <p>Access to activities and accessible transportation are facilitators to reducing SB (F)</p> | <p>"I think when you go out with a purpose – to go to a gym or a community centre, it plays a lot on your mind." P2</p> <p>"You got to encourage them just to start going out more. Get up and get out there! There's lots to do. You've got Wheeltrans, I find that's wonderful. I go shopping way down at Cloverdale, for an afternoon. I love it. I walk all over the place there. I love it." P3</p> <p>"Okay, you know what. So I just had an idea, right. Dance. Do you understand? Dance move. You know what I'm saying. Like people go, there's some good music, you know. And for 10 minutes, half an hour, or an hour or whatever, they boogie down there, you know what I'm saying. Dancing, whatever it is, you know." P13</p> |
|  |  | <p>The use of portable O2 tank can hinder or facilitate reducing SB (F,B)</p>                 | <p>"Oh yeah, if I didn't have the oxygen, I wouldn't have been here long ago, I would have been gone. When I'm doing my stuff? Walking, I can't walk without oxygen. It helps, because you go out more." P3 (F)</p> <p>"A lot of people, like I know people that go to a lot of places that have walkers. But I haven't got a great interest to go to a movie or anything like that with oxygen." P11 (B)</p> <p>"Sometimes it can be a barrier, because I can't just pop out and say gee I feel like going on a walk. Because to go for a walk or do anything, it says I need the tank. And it's one of those situations where it wouldn't be easy for me to move." P11 (B)</p>                                                           |

|                   |     |                                                                                                                                                                    |                                                                                                                                                                                                                                                                                                                                                                                                                                                                                                                                                                                                                                                                                                                                                                                  |
|-------------------|-----|--------------------------------------------------------------------------------------------------------------------------------------------------------------------|----------------------------------------------------------------------------------------------------------------------------------------------------------------------------------------------------------------------------------------------------------------------------------------------------------------------------------------------------------------------------------------------------------------------------------------------------------------------------------------------------------------------------------------------------------------------------------------------------------------------------------------------------------------------------------------------------------------------------------------------------------------------------------|
|                   |     | <p>Gym equipment at home is not enough to motivate patients to reduce SB</p> <p>The use of mobility aids can hinder or facilitate reducing SB (F,B)</p>            | <p>"We have a gym downstairs. It has all the necessary rowing machines, bicycles, treadmills, I never use them. I know other people in the day hospital have likewise in their homes. They never use them." P1</p> <p>"I used to have a wheelchair, for God sake! A wheelchair! Oh God! You encourage your own sedentary behaviour, you do. You encourage yourself to sit all the time " P4 (B)</p> <p>"So what you use [walking aids], you just get more, ask for something that will help you get out to places. Cause I don't want to sit home." P3 (F)</p>                                                                                                                                                                                                                   |
| Social influences | 123 | <p>Being surrounded by people versus living alone can be a barrier or a facilitator to reducing SB</p> <p>Being accountable facilitates changing behaviour (F)</p> | <p>"If you don't have to cook for someone, you're going to grab a sandwich, so you're not going to be moving that much." P14</p> <p>"if you were to come over, I would make you coffee and a snack, and we could sit and talk or go for a walk or something like that. But being by myself it's very easy to say I'm just going to lay down on the bed, I'm feeling tired." P2</p> <p>" Coming here we call it being policed! Maybe it doesn't sound right, but it fills the bill. So when you come here, they make you do it. Which I think is good." P1</p> <p>"I think communicating with someone. When I'm home alone, nobody's watching me, I can sit and watch TV. If I'm talking to you, or somebody from the day hospital, it's probably more motivating for me." P2</p> |

|          |    |                                                                                    |                                                                                                                                                                                                                                                                                                                                                                                                                                                                                                                                                                                                                                                                                                                                                                                                                                                                    |
|----------|----|------------------------------------------------------------------------------------|--------------------------------------------------------------------------------------------------------------------------------------------------------------------------------------------------------------------------------------------------------------------------------------------------------------------------------------------------------------------------------------------------------------------------------------------------------------------------------------------------------------------------------------------------------------------------------------------------------------------------------------------------------------------------------------------------------------------------------------------------------------------------------------------------------------------------------------------------------------------|
|          |    | Support from family, loved ones and peers is important to changing behaviour (F,B) | <p>"I think if you had a partner or somebody there that could encourage you, it would make a big difference. But when you're alone all the time, it's...." P9</p> <p>"You know, to say, for you (not you but) sit as a group and say, 'You're not doing the person any good by running after them. You're not doing them any good by doing everything for them. Because there must be some things that we can do ourselves. But we don't because we know you'll do it for us. So, for me to say – I would never say that. Because people that do help me think they're helping me. And I would never, ever say to them, 'No, don't do it', because they think they're doing me good. You saying it, on the other hand, is different. You know, as a group and you saying, as a group saying, 'You know, you think you're doing them good, but you're not.'" P4</p> |
| Emotions | 46 | Willingness to be engaged in activities that are interesting/fun to them. (F)      | <p>"I think to get them to move, you have to ask them what do they like. You have to find out what does the guy like to do. And then you have to be able to track that." P10</p> <p>"And I think if you give people an opportunity. I don't know what numbers would be but I would say, say there were 10 people. You give them an opportunity to find something they like to do, I'm going to say 6 of them are going to like it enough to start it at least. Which is going to leave 3 that carry on the rest of their life. So that to me is a win-win. At least they tried, 6 of them tried. 3 or 4 of them continue on." P12</p>                                                                                                                                                                                                                              |

|                        |    |                                                                                                                                                                                                                                                   |                                                                                                                                                                                                                                                                                                                                                                                                                                                                                                                                                                                                                                                                                                                                                                                                                                                                   |
|------------------------|----|---------------------------------------------------------------------------------------------------------------------------------------------------------------------------------------------------------------------------------------------------|-------------------------------------------------------------------------------------------------------------------------------------------------------------------------------------------------------------------------------------------------------------------------------------------------------------------------------------------------------------------------------------------------------------------------------------------------------------------------------------------------------------------------------------------------------------------------------------------------------------------------------------------------------------------------------------------------------------------------------------------------------------------------------------------------------------------------------------------------------------------|
|                        |    | Mood contributes to SB and vice versa (F,B)                                                                                                                                                                                                       | <p>"If I'm happy, I probably want to be more social. So I would get up and do things." COPD2</p> <p>"And if I'm sad, I do nothing, if I'm depressed, you know. And doing makes you happier. So yeah, definitely, it plays on all the things that makes you unable to help yourself. It picks on all the parts of you that's no good!" P9</p>                                                                                                                                                                                                                                                                                                                                                                                                                                                                                                                      |
| Behavioural regulation | 61 | <p>Due to their illness, there should be balance between sitting and being active</p> <p>Pacing to be more physically active is a facilitator to reducing SB (F)</p> <p>Self-monitoring and action planning are beneficial to reducing SB (F)</p> | <p>But that's [moving more] hard to do after you've been out all day. And you've got issues with your body, and you're tired. You're not going to do that, that's the trouble. At least with me." P14</p> <p>"I can get up and about, I get up and about a lot in the house. I do dusting, I stop when I'm tired and I do a bit more a little bit later. But I'm always doing something. Always re-arranging something in the kitchen." P3</p> <p>"You could be sitting at your computer, or watching television or reading a book, and set your alarm for every half an hour. It goes off, you get up and walk around the table, and then you sit back down and re-set it for another half hour." P4</p> <p>"And keeping records so you can see the fact that yes, you completed your assignments, you have done that thing that you are supposed to do." P5</p> |

|  |  |                                                                                                                                 |                                                                                                                                                                                                                                                                                                                                                                                                                                                                                                                                                                                                                                                                                                                                                                                                                                                                                                                                                                                                                         |
|--|--|---------------------------------------------------------------------------------------------------------------------------------|-------------------------------------------------------------------------------------------------------------------------------------------------------------------------------------------------------------------------------------------------------------------------------------------------------------------------------------------------------------------------------------------------------------------------------------------------------------------------------------------------------------------------------------------------------------------------------------------------------------------------------------------------------------------------------------------------------------------------------------------------------------------------------------------------------------------------------------------------------------------------------------------------------------------------------------------------------------------------------------------------------------------------|
|  |  | <p>Positive self-talk can be beneficial to reduce</p> <p>Breaking habits and generating alternatives facilitate reducing SB</p> | <p>"I'm a note thing: I itemize everything I have to do then I cross it off, and it makes me feel good when I cross it off." P14</p> <p>"When I set my alarm and it goes off, and I'm sitting in bed and I go, 'Am I going to go [out] or am I not going....will I go or will I stay home...'" And then I convince myself either to come or not come. Because I'm comfortable whether I'm lying or sitting. Will I go, or will I not go. But if I don't go, will I do my exercises? No, I won't. Okay, I'll go." P4</p> <p>"I guess you have to be motivated and tell yourself to move!" P14</p> <p>"Yeah, but you have to learn to take advantage of what you have ready, at home. With COPD you can't just go out in whatever weather. Like my thing is, I walk the halls in the winter, but I don't walk them in the summer. I come here or I go to Cloverdale or something and walk in the mall where it's safe." P12</p> <p>"Even during commercials I'm up almost every commercial when I'm watching tv." P12</p> |
|--|--|---------------------------------------------------------------------------------------------------------------------------------|-------------------------------------------------------------------------------------------------------------------------------------------------------------------------------------------------------------------------------------------------------------------------------------------------------------------------------------------------------------------------------------------------------------------------------------------------------------------------------------------------------------------------------------------------------------------------------------------------------------------------------------------------------------------------------------------------------------------------------------------------------------------------------------------------------------------------------------------------------------------------------------------------------------------------------------------------------------------------------------------------------------------------|
